# Supplementary material for: High Intensity Long Interval Sets Provides Similar Enjoyment as Continuous Moderate Intensity Exercise. The Tromsø Exercise Enjoyment Study
Source: Front Psychol. 2019 Aug 6;10:1788. doi: 10.3389/fpsyg.2019.01788 (PMC6691159; doi:10.3389/fpsyg.2019.01788)
Supplement: Supplementary file 3 [file Data_Sheet_2.ZIP › Readme.txt]

CON_RPE_DURING = rate of perceived exertion during moderate intensity continuous exercise
CON_RPE_AFTER = rate of perceived exertion after moderate intensity continuous exercise
CON_PACES_DURING = physical activity enjoyment scale during moderate intensity continuous exercise
CON_PACES_AFTER = physical activity enjoyment scale after moderate intensity continuous exercise
HIIE_RPE_DURING rate of perceived exertion during high intensity interval exercise
HIIE_RPE_AFTER rate of perceived exertion after high intensity interval exercise
HIIE_PACES_DURING = physical activity enjoyment scale during high intensity interval exercise
HIIE_PACES_AFTER = physical activity enjoyment scale after moderate intensity continuous exercise
Weight_KG = weight in kilograms
Height_CM = height in centimeters
Height_M = height in meters
HEIGHT_HEIGHT = height in meters multiplied by height in meters
BMI = body mass index h/kg2
RPE_exhaustion = rating of percieved exhaustion at volitional fatique 
VO2peak = peak oxygen uptake ml/kg/min
Age = age in years
Sex = 0=female, 1=male
CON_RPE_POOLED = rate of perceived exertion scale pooled (during + after) moderate intensity continuous exercise
HIIE_RPE_POOLED = rate of perceived exertion pooled (during + after) high intensity interval exercise
CON_PACES_POOLED = physical activity enjoyment scale pooled (during + after) moderate intensity continuous exercise
HIIE_PACES_POOLED = physical activity enjoyment scale pooled (during + after) high intensity interval exercise
